# Supplementary material for: Factors associated with COVID-19 vaccine uptake in people with kidney disease: an OpenSAFELY cohort study
Source: bioRxiv or medRxiv preprint supplement (doi:10.1101/2022.06.14.22276391), 2022-06-16
Supplement: Supplementary file [file media-1.pdf]

## Supplementary Appendix

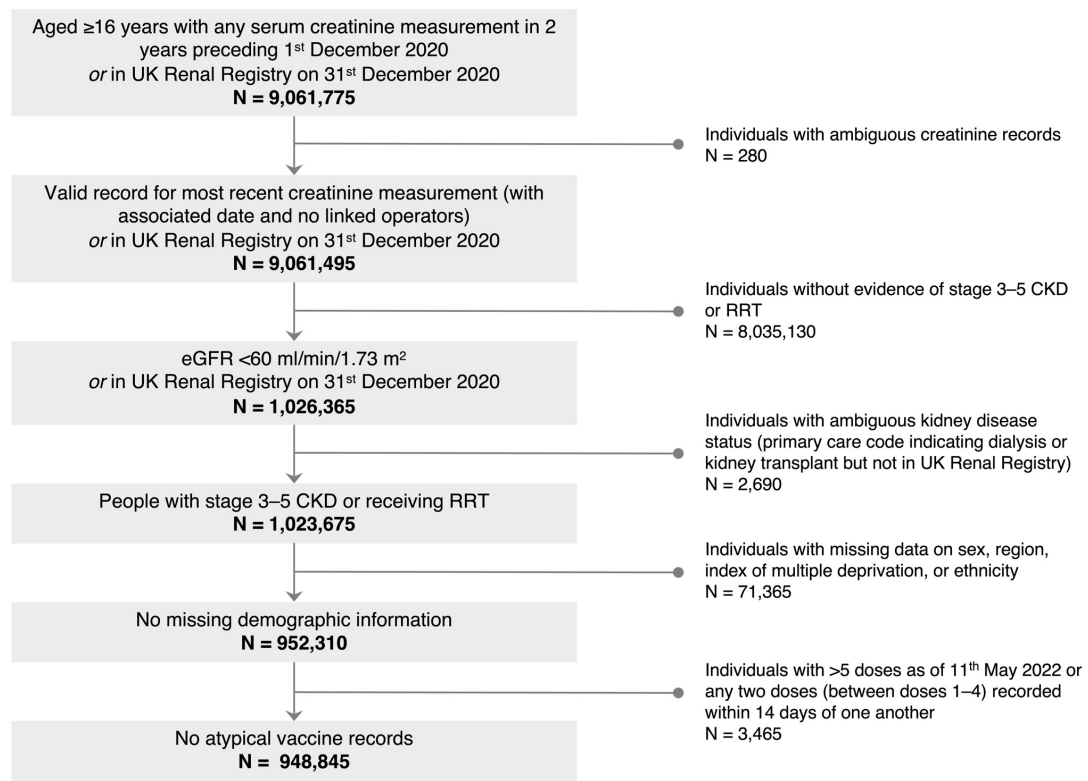

**Supplementary Figure 1. Flow chart of study eligibility.** Frequencies are rounded to the nearest 5. CKD, chronic kidney disease; eGFR, estimated glomerular filtrate rate; RRT, renal replacement therapy.

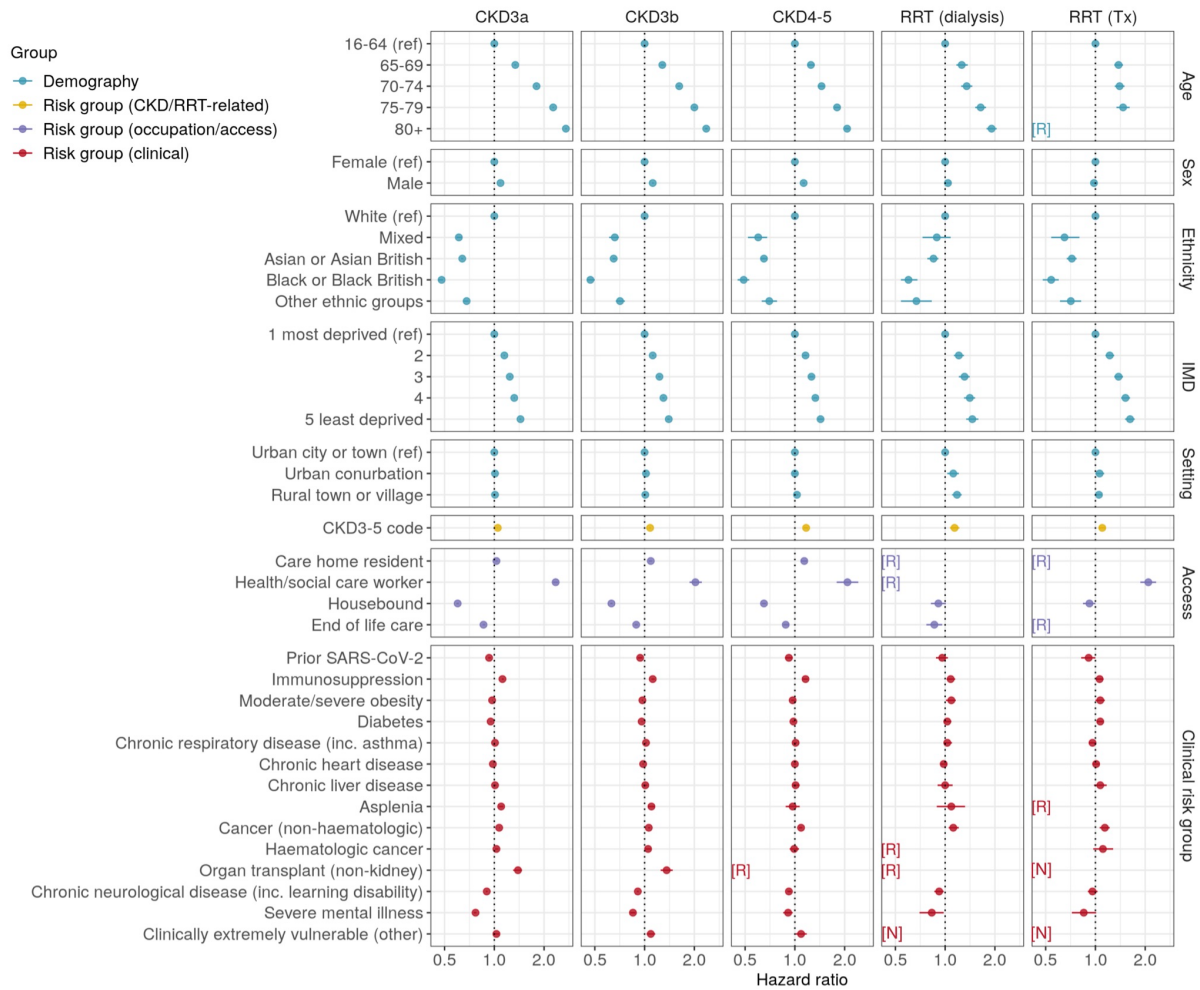

**Supplementary Figure 2. Factors associated with completion of a 4-dose vaccine series in kidney disease subgroups.** Individuals were included in the analysis if they were  $\geq 75$  years of age at baseline, care home residents, transplant recipients, or had a history of haematologic malignancy or immunosuppression. Hazard ratios and 95% confidence intervals were derived from partially adjusted models that included age, care home residence, health and social care worker status, housebound status, receipt of end-of-life care, setting (urban/rural), sex, ethnicity, IMD quintile, prior SARS-CoV-2 infection, immunosuppression, and haematologic cancer. Data are redacted [R] for any rows in which there were  $>0$  and  $\leq 10$  event or non-event counts after rounding to the nearest 5, with non-event counts calculated among uncensored individuals. CKD, chronic kidney disease; IMD, index of multiple deprivation; [N], covariate absent in all individuals by definition; [R], redacted; RRT, renal replacement therapy.

**Supplementary Table 1. Product profile by dose.**

| <b>Subgroup</b>                   | <b>Dose 1</b>   | <b>Dose 2</b>   | <b>Dose 3</b>   | <b>Dose 4</b>   |
|-----------------------------------|-----------------|-----------------|-----------------|-----------------|
| <b>Product</b>                    |                 |                 |                 |                 |
| BNT                               | 483,280 (53.5%) | 473,820 (53.8%) | 742,985 (92.1%) | 178,065 (47.0%) |
| AZ                                | 418,795 (46.4%) | 405,975 (46.1%) | 1,910 (0.2%)    | 110 (0.0%)      |
| MOD                               | 570 (0.1%)      | 905 (0.1%)      | 61,515 (7.6%)   | 200,445 (52.9%) |
| <b>2-dose product combination</b> |                 |                 |                 |                 |
| BNT-BNT                           | –               | 470,655 (53.4%) | –               | –               |
| AZ-AZ                             | –               | 402,395 (45.7%) | –               | –               |
| BNT-AZ                            | –               | 3,580 (0.4%)    | –               | –               |
| AZ-BNT                            | –               | 3,125 (0.4%)    | –               | –               |
| Other                             | –               | 945 (0.1%)      | –               | –               |
| <b>3-dose product combination</b> |                 |                 |                 |                 |
| BNT-BNT-BNT                       | –               | –               | 419,020 (52.0%) | –               |
| AZ-AZ-BNT                         | –               | –               | 320,100 (39.7%) | –               |
| AZ-AZ-MOD                         | –               | –               | 40,875 (5.1%)   | –               |
| BNT-BNT-MOD                       | –               | –               | 20,015 (2.5%)   | –               |
| BNT-AZ-BNT                        | –               | –               | 2,490 (0.3%)    | –               |
| AZ-AZ-AZ                          | –               | –               | 1,670 (0.2%)    | –               |
| AZ-BNT-BNT                        | –               | –               | 1,185 (0.1%)    | –               |
| Other                             | –               | –               | 1,060 (0.1%)    | –               |

Frequencies are rounded to the nearest 5. Any dose combinations given to <1000 individuals were pooled as 'Other'. AZ, ChAdOx1-S (AstraZeneca); BNT, BNT162b2 (Pfizer-BioNTech); MOD, mRNA-1273 (Moderna).

**Supplementary Table 2. Cox proportional hazards model and logistic regression outputs for factors associated with completion of a 3-dose vaccination series in people with kidney disease.**

| Variable                                     | Cox models        |          |                                 |                                 |                             | Logistic regression |                                 |
|----------------------------------------------|-------------------|----------|---------------------------------|---------------------------------|-----------------------------|---------------------|---------------------------------|
|                                              | N (n events)      | Cov. (%) | HR (95% CI), minimally adjusted | HR (95% CI), partially adjusted | HR (95% CI), fully adjusted | N (n events)        | OR (95% CI), partially adjusted |
| <b>*†Age</b>                                 |                   |          |                                 |                                 |                             |                     |                                 |
| 16–64 (ref)                                  | 104,770 (84,815)  | 84.1     | 1.00                            | 1.00                            | 1.00                        | 99,200 (83,700)     | 1.00                            |
| 65–69                                        | 70,790 (62,075)   | 91.6     | 1.32 (1.31–1.33)                | 1.29 (1.27–1.30)                | 1.31 (1.30–1.33)            | 66,485 (61,115)     | 1.90 (1.83–1.96)                |
| 70–74                                        | 135,900 (122,380) | 94.5     | 1.75 (1.73–1.77)                | 1.67 (1.66–1.69)                | 1.71 (1.70–1.73)            | 126,665 (120,080)   | 2.69 (2.61–2.78)                |
| 75–79                                        | 172,530 (155,085) | 95.5     | 2.18 (2.16–2.20)                | 2.09 (2.07–2.11)                | 2.15 (2.13–2.17)            | 157,535 (150,935)   | 3.30 (3.20–3.40)                |
| 80+                                          | 464,860 (381,885) | 95.0     | 2.45 (2.43–2.47)                | 2.46 (2.44–2.48)                | 2.55 (2.53–2.57)            | 371,785 (355,415)   | 3.20 (3.12–3.28)                |
| <b>†Sex</b>                                  |                   |          |                                 |                                 |                             |                     |                                 |
| Female (ref)                                 | 530,685 (451,975) | 93.2     | 1.00                            | 1.00                            | 1.00                        | 462,955 (433,405)   | 1.00                            |
| Male                                         | 418,160 (354,265) | 93.8     | 1.11 (1.11–1.12)                | 1.10 (1.09–1.10)                | 1.10 (1.10–1.11)            | 358,715 (337,840)   | 1.18 (1.16–1.20)                |
| <b>†Ethnicity</b>                            |                   |          |                                 |                                 |                             |                     |                                 |
| White (ref)                                  | 888,875 (764,800) | 94.7     | 1.00                            | 1.00                            | 1.00                        | 768,730 (731,110)   | 1.00                            |
| Mixed                                        | 5,110 (3,670)     | 77.1     | 0.61 (0.59–0.63)                | 0.63 (0.61–0.65)                | 0.63 (0.61–0.65)            | 4,590 (3,560)       | 0.30 (0.28–0.32)                |
| Asian or Asian British                       | 32,245 (23,100)   | 78.6     | 0.62 (0.61–0.63)                | 0.66 (0.65–0.67)                | 0.66 (0.65–0.67)            | 28,185 (22,340)     | 0.33 (0.32–0.35)                |
| Black or Black British                       | 16,345 (10,035)   | 65.8     | 0.46 (0.45–0.47)                | 0.48 (0.47–0.49)                | 0.48 (0.47–0.49)            | 14,725 (9,780)      | 0.20 (0.20–0.21)                |
| Other ethnic groups                          | 6,270 (4,640)     | 81.3     | 0.68 (0.66–0.70)                | 0.69 (0.67–0.71)                | 0.69 (0.67–0.71)            | 5,440 (4,455)       | 0.34 (0.31–0.36)                |
| <b>†IMD</b>                                  |                   |          |                                 |                                 |                             |                     |                                 |
| 1 most deprived (ref)                        | 158,960 (125,290) | 87.6     | 1.00                            | 1.00                            | 1.00                        | 135,750 (119,600)   | 1.00                            |
| 2                                            | 180,015 (149,635) | 92.0     | 1.18 (1.17–1.19)                | 1.14 (1.14–1.15)                | 1.14 (1.13–1.15)            | 154,825 (143,160)   | 1.44 (1.40–1.48)                |
| 3                                            | 214,280 (184,140) | 94.4     | 1.31 (1.30–1.32)                | 1.25 (1.24–1.26)                | 1.24 (1.23–1.25)            | 185,775 (176,125)   | 1.83 (1.78–1.88)                |
| 4                                            | 207,080 (180,565) | 95.5     | 1.40 (1.39–1.41)                | 1.32 (1.31–1.33)                | 1.31 (1.30–1.32)            | 180,325 (172,735)   | 2.10 (2.03–2.16)                |
| 5 least deprived                             | 188,510 (166,605) | 96.4     | 1.52 (1.51–1.53)                | 1.43 (1.42–1.44)                | 1.42 (1.41–1.43)            | 164,995 (159,625)   | 2.60 (2.52–2.69)                |
| <b>†Setting</b>                              |                   |          |                                 |                                 |                             |                     |                                 |
| Urban city or town (ref)                     | 506,660 (432,255) | 93.8     | 1.00                            | 1.00                            | 1.00                        | 439,015 (413,745)   | 1                               |
| Urban conurbation                            | 199,215 (160,590) | 89.3     | 0.95 (0.94–0.96)                | 1.01 (1.01–1.02)                | 1.01 (1.00–1.02)            | 170,700 (153,335)   | 0.87 (0.85–0.90)                |
| Rural town or village                        | 242,975 (213,390) | 96.0     | 1.08 (1.08–1.09)                | 1.01 (1.01–1.02)                | 1.01 (1.01–1.02)            | 211,955 (204,170)   | 1.20 (1.16–1.23)                |
| <b>Kidney disease subgroup</b>               |                   |          |                                 |                                 |                             |                     |                                 |
| CKD3a (ref)                                  | 627,265 (547,740) | 93.7     | 1.00                            | 1.00                            | 1.00                        | 563,295 (529,545)   | 1.00                            |
| CKD3b                                        | 236,205 (194,455) | 93.8     | 0.92 (0.92–0.93)                | 0.94 (0.93–0.94)                | 0.93 (0.92–0.93)            | 193,880 (182,825)   | 0.94 (0.92–0.96)                |
| CKD4–5                                       | 63,165 (46,400)   | 91.7     | 0.84 (0.83–0.85)                | 0.87 (0.87–0.88)                | 0.86 (0.85–0.87)            | 45,450 (42,055)     | 0.84 (0.81–0.88)                |
| RRT (dialysis)                               | 9,440 (6,880)     | 86.3     | 1.03 (1.00–1.05)                | 1.09 (1.07–1.12)                | 1.07 (1.05–1.10)            | 7,280 (6,335)       | 1.06 (0.99–1.15)                |
| RRT (transplant)                             | 12,770 (10,765)   | 88.7     | 1.54 (1.51–1.57)                | 1.45 (1.42–1.49)                | 1.44 (1.41–1.47)            | 11,765 (10,490)     | 1.09 (1.01–1.17)                |
| <b>Primary care coding of kidney disease</b> |                   |          |                                 |                                 |                             |                     |                                 |
| CKD diagnostic code                          | 563,335 (478,860) | 94.1     | 1.03 (1.02–1.03)                | 1.04 (1.03–1.04)                | 1.06 (1.06–1.07)            | 482,525 (456,065)   | 1.23 (1.21–1.25)                |
| <b>Risk group (occupation/access)</b>        |                   |          |                                 |                                 |                             |                     |                                 |
| *†Care home resident                         | 43,385 (27,150)   | 94.5     | 1.01 (1.00–1.02)                | 1.06 (1.05–1.07)                | 1.11 (1.10–1.12)            | 23,070 (21,910)     | 1.02 (0.96–1.09)                |
| *†Health/ social care worker                 | 5,175 (4,770)     | 93.2     | 2.15 (2.09–2.21)                | 2.27 (2.21–2.34)                | 2.25 (2.19–2.32)            | 5,060 (4,730)       | 2.66 (2.36–2.99)                |
| †Housebound                                  | 53,520 (37,175)   | 92.4     | 0.60 (0.59–0.60)                | 0.61 (0.61–0.62)                | 0.63 (0.62–0.63)            | 35,160 (32,795)     | 0.79 (0.76–0.83)                |

|                                |                   |      |                  |                  |                  |                   |                  |
|--------------------------------|-------------------|------|------------------|------------------|------------------|-------------------|------------------|
| †End of life care              | 39,430 (23,495)   | 92.6 | 0.82 (0.81–0.83) | 0.87 (0.85–0.88) | 0.87 (0.86–0.88) | 21,080 (19,740)   | 0.86 (0.81–0.91) |
| <b>Risk group (clinical)</b>   |                   |      |                  |                  |                  |                   |                  |
| †Prior SARS-CoV-2              | 25,490 (17,785)   | 90.7 | 0.89 (0.88–0.91) | 0.94 (0.92–0.95) | 0.94 (0.93–0.96) | 17,785 (16,230)   | 0.96 (0.91–1.02) |
| †Immunosuppression             | 80,025 (67,140)   | 93.8 | 1.17 (1.16–1.18) | 1.19 (1.18–1.20) | 1.11 (1.10–1.12) | 67,605 (63,680)   | 1.39 (1.34–1.45) |
| Moderate/severe obesity        | 108,950 (94,075)  | 92.5 | 0.93 (0.92–0.94) | 0.97 (0.96–0.97) | 0.98 (0.97–0.99) | 98,525 (91,440)   | 1.11 (1.08–1.14) |
| Diabetes                       | 269,895 (222,880) | 92.6 | 0.91 (0.90–0.91) | 0.95 (0.95–0.96) | 0.96 (0.96–0.97) | 227,180 (211,585) | 1.06 (1.04–1.08) |
| CRD (inc. asthma)              | 210,095 (174,610) | 93.5 | 0.98 (0.98–0.99) | 1.01 (1.00–1.01) | 1.01 (1.01–1.02) | 176,195 (165,520) | 1.05 (1.03–1.08) |
| Chronic heart disease          | 425,575 (352,775) | 94.4 | 0.98 (0.98–0.99) | 0.98 (0.97–0.98) | 0.99 (0.98–0.99) | 349,835 (331,995) | 1.06 (1.04–1.09) |
| Chronic liver disease          | 31,285 (26,060)   | 91.9 | 1.00 (0.99–1.01) | 1.01 (0.99–1.02) | 1.01 (1.00–1.02) | 27,045 (24,990)   | 1.01 (0.96–1.06) |
| Asplenia                       | 8,405 (7,180)     | 94.3 | 1.10 (1.07–1.12) | 1.08 (1.06–1.11) | 1.08 (1.06–1.11) | 7,270 (6,875)     | 1.19 (1.07–1.32) |
| Cancer (non-haematologic)      | 164,110 (136,440) | 95.4 | 1.09 (1.08–1.10) | 1.07 (1.06–1.08) | 1.07 (1.06–1.08) | 134,180 (128,730) | 1.30 (1.27–1.34) |
| †Haematologic cancer           | 19,990 (16,325)   | 95.4 | 1.16 (1.14–1.18) | 0.99 (0.97–1.00) | 1.04 (1.03–1.06) | 15,800 (15,175)   | 1.07 (0.98–1.18) |
| Organ transplant (non-kidney)  | 2,170 (1,865)     | 93.0 | 1.46 (1.39–1.52) | 1.31 (1.26–1.38) | 1.39 (1.33–1.46) | 1,910 (1,795)     | 1.41 (1.16–1.72) |
| CND (inc. learning disability) | 158,200 (124,130) | 93.4 | 0.89 (0.88–0.89) | 0.90 (0.90–0.91) | 0.91 (0.90–0.91) | 121,505 (114,275) | 0.90 (0.87–0.92) |
| Severe mental illness          | 16,270 (12,665)   | 87.2 | 0.76 (0.75–0.77) | 0.79 (0.78–0.81) | 0.80 (0.78–0.81) | 13,735 (12,055)   | 0.67 (0.63–0.70) |
| CEV (other)                    | 5,750 (4,815)     | 91.6 | 1.01 (0.98–1.03) | 1.05 (1.02–1.08) | 1.03 (1.00–1.06) | 4,965 (4,580)     | 0.93 (0.83–1.04) |

Cumulative coverage was determined based on Kaplan-Meier estimates, censoring on death, deregistration, or 11<sup>th</sup> May 2022. Logistic regression models included 821,670 individuals who were uncensored (registered and alive) as of the analysis cut-off (11<sup>th</sup> May 2022). \* variable included in all minimally adjusted models; † variable included in all partially adjusted models. CI, confidence interval; CKD, chronic kidney disease; HR, hazard ratio; IMD, index of multiple deprivation; OR, odds ratio; RRT, renal replacement therapy.

**Supplementary Table 3. Cox proportional hazards models for factors associated with completion of a 3-dose vaccination series in kidney disease subgroups.**

| Variable                                     | CKD3a             |          |                  | CKD3b             |          |                  | CKD4-5          |          |                  | RRT (dialysis) |          |                  | RRT (transplant) |          |                  |
|----------------------------------------------|-------------------|----------|------------------|-------------------|----------|------------------|-----------------|----------|------------------|----------------|----------|------------------|------------------|----------|------------------|
|                                              | N (n events)      | Cov. (%) | HR (95% CI)      | N (n events)      | Cov. (%) | HR (95% CI)      | N (n events)    | Cov. (%) | HR (95% CI)      | N (n events)   | Cov. (%) | HR (95% CI)      | N (n events)     | Cov. (%) | HR (95% CI)      |
| <b>+Age</b>                                  |                   |          |                  |                   |          |                  |                 |          |                  |                |          |                  |                  |          |                  |
| 16-64 (ref)                                  | 71,970 (59,135)   | 84.5     | 1.00             | 13,245 (10,360)   | 82.5     | 1.00             | 5,870 (4,385)   | 80.7     | 1.00             | 4,390 (3,165)  | 79.9     | 1.00             | 9,295 (7,770)    | 86.7     | 1.00             |
| 65-69                                        | 54,435 (48,425)   | 92.0     | 1.34 (1.32-1.36) | 10,815 (9,205)    | 90.5     | 1.28 (1.25-1.32) | 3,020 (2,355)   | 88.1     | 1.25 (1.19-1.32) | 1,095 (830)    | 88.0     | 1.26 (1.17-1.37) | 1,425 (1,260)    | 94.3     | 1.38 (1.30-1.47) |
| 70-74                                        | 102,975 (94,125)  | 94.8     | 1.80 (1.78-1.82) | 24,730 (21,670)   | 93.8     | 1.62 (1.58-1.65) | 5,865 (4,700)   | 91.2     | 1.45 (1.39-1.51) | 1,145 (855)    | 90.3     | 1.35 (1.25-1.46) | 1,180 (1,035)    | 94.2     | 1.40 (1.31-1.50) |
| 75-79                                        | 124,030 (113,350) | 95.7     | 2.27 (2.25-2.29) | 38,245 (33,655)   | 95.0     | 2.00 (1.96-2.05) | 8,410 (6,645)   | 93.5     | 1.80 (1.73-1.87) | 1,220 (920)    | 94.5     | 1.64 (1.52-1.77) | 620 (510)        | 94.0     | 1.47 (1.34-1.61) |
| 80+                                          | 273,855 (232,705) | 95.3     | 2.71 (2.69-2.74) | 149,170 (119,565) | 94.8     | 2.36 (2.31-2.41) | 40,000 (28,315) | 93.5     | 2.07 (2.00-2.14) | 1,590 (1,110)  | 93.1     | 1.91 (1.78-2.05) | [R]              | [R]      | [R]              |
| <b>+Sex</b>                                  |                   |          |                  |                   |          |                  |                 |          |                  |                |          |                  |                  |          |                  |
| Female (ref)                                 | 355,460 (310,735) | 93.4     | 1.00             | 134,120 (110,490) | 93.4     | 1.00             | 32,700 (24,050) | 91.3     | 1.00             | 3,480 (2,530)  | 84.7     | 1.00             | 4,925 (4,175)    | 88.5     | 1.00             |
| Male                                         | 271,805 (237,005) | 94.0     | 1.09 (1.08-1.09) | 102,085 (83,965)  | 94.2     | 1.12 (1.11-1.14) | 30,465 (22,355) | 92.1     | 1.13 (1.11-1.15) | 5,960 (4,355)  | 87.0     | 1.04 (0.99-1.09) | 7,845 (6,590)    | 88.6     | 0.98 (0.95-1.02) |
| <b>+Ethnicity</b>                            |                   |          |                  |                   |          |                  |                 |          |                  |                |          |                  |                  |          |                  |
| White (ref)                                  | 590,315 (521,735) | 94.9     | 1.00             | 222,900 (185,385) | 94.9     | 1.00             | 57,975 (43,250) | 93.5     | 1.00             | 7,295 (5,415)  | 88.9     | 1.00             | 10,390 (9,015)   | 91.2     | 1.00             |
| Mixed                                        | 3,415 (2,470)     | 76.1     | 0.61 (0.59-0.64) | 1,065 (770)       | 79.8     | 0.66 (0.61-0.70) | 350 (220)       | 73.6     | 0.60 (0.52-0.68) | 140 (105)      | 76.9     | 0.89 (0.73-1.08) | 140 (100)        | 71.4     | 0.65 (0.54-0.80) |
| Asian or Asian British                       | 18,720 (13,805)   | 79.0     | 0.64 (0.63-0.65) | 7,595 (5,310)     | 78.3     | 0.65 (0.64-0.67) | 3,120 (1,915)   | 74.7     | 0.65 (0.62-0.68) | 1,295 (920)    | 80.6     | 0.85 (0.78-0.91) | 1,510 (1,145)    | 79.4     | 0.72 (0.67-0.77) |
| Black or Black British                       | 10,840 (6,710)    | 65.1     | 0.48 (0.46-0.49) | 3,240 (1,965)     | 66.8     | 0.47 (0.45-0.50) | 1,225 (695)     | 65.5     | 0.49 (0.45-0.53) | 570 (355)      | 67.5     | 0.60 (0.54-0.68) | 470 (310)        | 68.9     | 0.54 (0.48-0.60) |
| Other ethnic groups                          | 3,975 (3,015)     | 81.6     | 0.68 (0.65-0.70) | 1,405 (1,025)     | 82.0     | 0.71 (0.67-0.76) | 495 (320)       | 76.1     | 0.70 (0.63-0.78) | 135 (85)       | 66.2     | 0.67 (0.54-0.83) | 260 (190)        | 76.7     | 0.71 (0.61-0.82) |
| <b>+IMD</b>                                  |                   |          |                  |                   |          |                  |                 |          |                  |                |          |                  |                  |          |                  |
| 1 most deprived (ref)                        | 100,965 (82,025)  | 87.9     | 1.00             | 40,770 (31,390)   | 88.5     | 1.00             | 12,015 (8,120)  | 84.9     | 1.00             | 2,610 (1,770)  | 78.8     | 1.00             | 2,600 (1,990)    | 80.2     | 1.00             |
| 2                                            | 116,850 (99,945)  | 92.2     | 1.15 (1.14-1.16) | 45,630 (36,860)   | 92.5     | 1.12 (1.11-1.14) | 12,685 (9,090)  | 90.2     | 1.16 (1.12-1.19) | 2,185 (1,555)  | 84.8     | 1.21 (1.13-1.30) | 2,665 (2,185)    | 86.0     | 1.22 (1.15-1.30) |
| 3                                            | 141,655 (124,995) | 94.6     | 1.24 (1.23-1.26) | 53,770 (44,755)   | 94.8     | 1.23 (1.21-1.25) | 14,205 (10,595) | 92.9     | 1.26 (1.22-1.30) | 1,890 (1,425)  | 88.2     | 1.31 (1.21-1.41) | 2,760 (2,370)    | 90.2     | 1.38 (1.30-1.47) |
| 4                                            | 139,220 (124,375) | 95.6     | 1.32 (1.31-1.33) | 50,790 (42,810)   | 95.6     | 1.30 (1.28-1.32) | 13,015 (9,975)  | 94.5     | 1.33 (1.29-1.37) | 1,530 (1,195)  | 91.2     | 1.41 (1.30-1.52) | 2,520 (2,210)    | 92.2     | 1.52 (1.43-1.62) |
| 5 least deprived                             | 128,575 (116,400) | 96.6     | 1.44 (1.42-1.45) | 45,240 (38,635)   | 96.4     | 1.40 (1.37-1.42) | 11,245 (8,625)  | 95.4     | 1.43 (1.38-1.48) | 1,230 (935)    | 91.6     | 1.46 (1.34-1.59) | 2,225 (2,010)    | 93.8     | 1.62 (1.51-1.73) |
| <b>+Setting</b>                              |                   |          |                  |                   |          |                  |                 |          |                  |                |          |                  |                  |          |                  |
| Urban city or town (ref)                     | 334,925 (293,565) | 94.0     | 1.00             | 126,760 (104,820) | 94.2     | 1.00             | 33,625 (24,845) | 92.4     | 1.00             | 4,735 (3,400)  | 86.0     | 1.00             | 6,615 (5,630)    | 89.3     | 1.00             |
| Urban conurbation                            | 128,630 (106,790) | 89.7     | 1.01 (1.00-1.02) | 49,545 (38,800)   | 89.8     | 1.02 (1.00-1.03) | 14,540 (10,095) | 86.3     | 1.00 (0.97-1.03) | 3,000 (2,135)  | 82.4     | 1.12 (1.03-1.21) | 3,495 (2,770)    | 83.1     | 1.06 (1.00-1.13) |
| Rural town or village                        | 163,705 (147,385) | 96.1     | 1.01 (1.00-1.02) | 59,900 (50,830)   | 96.1     | 1.01 (1.00-1.02) | 15,000 (11,460) | 95.2     | 1.03 (1.01-1.05) | 1,705 (1,345)  | 93.2     | 1.18 (1.10-1.26) | 2,660 (2,370)    | 93.5     | 1.05 (1.00-1.10) |
| <b>Primary care coding of kidney disease</b> |                   |          |                  |                   |          |                  |                 |          |                  |                |          |                  |                  |          |                  |
| CKD diagnostic code                          | 306,820 (270,530) | 94.5     | 1.05 (1.04-1.05) | 183,225 (152,815) | 94.3     | 1.08 (1.07-1.09) | 55,645 (41,425) | 92.2     | 1.17 (1.13-1.20) | 7,990 (5,895)  | 87.6     | 1.14 (1.07-1.22) | 9,655 (8,200)    | 89.6     | 1.10 (1.05-1.15) |
| <b>Risk group (occupation/access)</b>        |                   |          |                  |                   |          |                  |                 |          |                  |                |          |                  |                  |          |                  |
| +Care home resident                          | 23,700 (15,635)   | 94.5     | 1.03 (1.02-1.05) | 14,845 (8,955)    | 94.6     | 1.09 (1.06-1.11) | 4,605 (2,425)   | 93.2     | 1.14 (1.09-1.19) | [R]            | [R]      | [R]              | [R]              | [R]      | [R]              |
| +Health/social care worker                   | 3,975 (3,680)     | 93.5     | 2.35 (2.27-2.43) | 585 (530)         | 89.7     | 2.03 (1.87-2.22) | 195 (170)       | 84.2     | 2.08 (1.79-2.42) | [R]            | [R]      | [R]              | 355 (335)        | 91.7     | 2.09 (1.87-2.33) |
| +Housebound                                  | 26,735 (19,485)   | 92.7     | 0.60 (0.59-0.61) | 18,770 (12,815)   | 92.4     | 0.63 (0.62-0.64) | 6,800 (3,985)   | 90.4     | 0.65 (0.63-0.67) | 600 (370)      | 88.4     | 0.91 (0.82-1.01) | 615 (520)        | 89.2     | 0.92 (0.84-1.00) |
| +End of life care                            | 20,070 (12,665)   | 92.9     | 0.86 (0.85-0.88) | 13,185 (7,700)    | 92.9     | 0.89 (0.87-0.91) | 5,385 (2,640)   | 90.7     | 0.88 (0.85-0.92) | 600 (355)      | 84.7     | 0.86 (0.77-0.96) | [R]              | [R]      | [R]              |
| <b>Risk group (clinical)</b>                 |                   |          |                  |                   |          |                  |                 |          |                  |                |          |                  |                  |          |                  |
| +Prior SARS-CoV-2                            | 14,290 (10,625)   | 91.4     | 0.93 (0.92-0.95) | 7,135 (4,690)     | 91.5     | 0.94 (0.91-0.97) | 2,545 (1,400)   | 88.1     | 0.92 (0.87-0.97) | 1,000 (670)    | 82.0     | 0.96 (0.88-1.04) | 515 (400)        | 81.5     | 0.91 (0.82-1.00) |
| Immunosuppression                            | 43,575 (37,735)   | 94.9     | 1.12 (1.11-1.14) | 18,245 (14,895)   | 94.8     | 1.12 (1.10-1.15) | 5,525 (3,980)   | 92.7     | 1.16 (1.11-1.20) | 2,065 (1,540)  | 85.6     | 1.08 (1.02-1.15) | 10,615 (8,995)   | 89.1     | 1.06 (1.01-1.12) |
| Moderate/severe obesity                      | 71,070 (62,710)   | 92.6     | 0.97 (0.97-0.98) | 27,390 (23,215)   | 92.9     | 0.97 (0.96-0.98) | 8,000 (6,145)   | 90.7     | 0.97 (0.95-1.00) | 1,325 (1,005)  | 87.5     | 1.09 (1.01-1.16) | 1,160 (995)      | 89.0     | 1.07 (1.00-1.14) |
| Diabetes                                     | 152,745 (130,485) | 92.8     | 0.95 (0.95-0.96) | 81,390 (66,145)   | 92.9     | 0.96 (0.96-0.97) | 27,680 (20,000) | 91.0     | 0.98 (0.96-1.00) | 4,040 (2,860)  | 87.5     | 1.03 (0.98-1.09) | 4,040 (3,390)    | 89.9     | 1.07 (1.02-1.11) |
| CRD (inc. asthma)                            | 136,395 (116,745) | 93.6     | 1.01 (1.00-1.01) | 54,735 (44,070)   | 93.9     | 1.02 (1.01-1.03) | 14,675 (10,480) | 91.7     | 1.01 (0.98-1.03) | 2,035 (1,440)  | 86.9     | 1.03 (0.98-1.10) | 2,255 (1,880)    | 88.0     | 0.96 (0.91-1.01) |
| Chronic heart disease                        | 255,835 (219,880) | 94.7     | 0.98 (0.98-0.99) | 125,250 (100,865) | 94.4     | 0.98 (0.97-0.99) | 35,895 (25,480) | 92.8     | 1.00 (0.98-1.02) | 4,740 (3,355)  | 87.7     | 0.98 (0.94-1.03) | 3,860 (3,195)    | 90.1     | 1.01 (0.96-1.05) |
| Chronic liver disease                        | 20,250 (17,365)   | 92.1     | 1.01 (1.00-1.03) | 7,650 (6,190)     | 92.3     | 1.01 (0.98-1.04) | 2,245 (1,630)   | 90.3     | 1.01 (0.97-1.07) | 550 (380)      | 80.5     | 1.00 (0.90-1.11) | 585 (490)        | 88.8     | 1.07 (0.98-1.17) |
| Asplenia                                     | 5,485 (4,835)     | 94.7     | 1.10 (1.07-1.13) | 2,035 (1,695)     | 93.5     | 1.10 (1.05-1.15) | 575 (400)       | 87.4     | 0.97 (0.88-1.07) | 140 (100)      | 83.3     | 1.09 (0.89-1.32) | [R]              | [R]      | [R]              |
| Cancer (non-haematologic)                    | 103,955 (89,290)  | 95.6     | 1.07 (1.07-1.08) | 45,090 (36,250)   | 95.5     | 1.06 (1.05-1.08) | 12,800 (9,115)  | 94.1     | 1.09 (1.06-1.11) | 1,305 (965)    | 91.4     | 1.12 (1.05-1.21) | 960 (820)        | 92.0     | 1.14 (1.06-1.22) |
| Haematologic cancer                          | 11,885 (10,075)   | 95.6     | 1.03 (1.01-1.06) | 5,705 (4,560)     | 95.5     | 1.05 (1.01-1.09) | 1,845 (1,265)   | 92.7     | 0.99 (0.93-1.06) | [R]            | [R]      | [R]              | 240 (205)        | 89.6     | 1.11 (0.97-1.28) |
| Organ transplant (non-kidney)                | 1,195 (1,055)     | 92.0     | 1.39 (1.30-1.47) | 685 (575)         | 93.0     | 1.36 (1.25-1.48) | [R]             | [R]      | [R]              | [R]            | [R]      | [R]              | [N]              | [N]      | [N]              |
| CND (inc. learning disability)               | 96,415 (78,640)   | 93.7     | 0.90 (0.89-0.91) | 46,255 (34,965)   | 93.4     | 0.91 (0.90-0.92) | 12,905 (8,540)  | 91.6     | 0.92 (0.90-0.95) | 1,440 (995)    | 86.0     | 0.92 (0.86-0.98) | 1,185 (985)      | 89.2     | 0.96 (0.90-1.03) |
| Severe mental illness                        | 10,465 (8,255)    | 86.4     | 0.77 (0.75-0.78) | 4,105 (3,205)     | 89.6     | 0.85 (0.82-0.88) | 1,310 (925)     | 87.1     | 0.91 (0.85-0.97) | 220 (145)      | 72.2     | 0.83 (0.70-0.98) | 170 (135)        | 81.2     | 0.85 (0.72-1.01) |
| CEV (other)                                  | 3,480 (2,990)     | 92.1     | 1.03 (0.99-1.07) | 1,465 (1,195)     | 92.1     | 1.09 (1.03-1.16) | 810 (630)       | 87.3     | 1.09 (1.01-1.18) | [N]            | [N]      | [N]              | [N]              | [N]      | [N]              |

Counts are rounded to the nearest 5. Cumulative coverage was determined based on Kaplan-Meier estimates, censoring on death, deregistration, or 11<sup>th</sup> May 2022. Hazard ratios and 95% confidence intervals were derived from partially adjusted models that included age, care home residence, health and social care worker status, housebound status, receipt of end-of-life care, setting (urban/rural), sex, ethnicity, IMD quintile, prior SARS-CoV-2 infection, immunosuppression, and haematologic cancer. Data are redacted [R] for any rows in which there were >0 and ≤10 event or non-event counts after rounding to the nearest 5, with non-event counts calculated among uncensored individuals. CEV, clinically extremely vulnerable; CKD, chronic kidney disease; CND, chronic neurological disease; IMD, index of multiple deprivation; [N], covariate absent in all individuals by definition; [R] redacted; RRT, renal replacement therapy.

**Supplementary Table 4. Baseline characteristics of secondary outcome analysis population (dose 4 uptake).**

| <b>Characteristic</b>                         | <b>All<br/>N = 679,405</b> | <b>CKD3a<br/>N = 418,095</b> | <b>CKD3b<br/>N = 193,475</b> | <b>CKD4–5<br/>N = 50,465</b> | <b>RRT (dialysis)<br/>N = 4,595</b> | <b>RRT (transplant)<br/>N = 12,770</b> |
|-----------------------------------------------|----------------------------|------------------------------|------------------------------|------------------------------|-------------------------------------|----------------------------------------|
| <b>Age</b>                                    |                            |                              |                              |                              |                                     |                                        |
| 16–64                                         | 20,015 (2.9%)              | 6,775 (1.6%)                 | 1,845 (1.0%)                 | 800 (1.6%)                   | 1,300 (28.3%)                       | 9,295 (72.8%)                          |
| 65–69                                         | 8,210 (1.2%)               | 4,705 (1.1%)                 | 1,395 (0.7%)                 | 435 (0.9%)                   | 245 (5.3%)                          | 1,425 (11.2%)                          |
| 70–74                                         | 13,795 (2.0%)              | 8,730 (2.1%)                 | 2,815 (1.5%)                 | 825 (1.6%)                   | 245 (5.3%)                          | 1,180 (9.2%)                           |
| 75–79                                         | 172,530 (25.4%)            | 124,030 (29.7%)              | 38,245 (19.8%)               | 8,410 (16.7%)                | 1,220 (26.6%)                       | 620 (4.9%)                             |
| 80+                                           | 464,860 (68.4%)            | 273,855 (65.5%)              | 149,170 (77.1%)              | 40,000 (79.3%)               | 1,590 (34.6%)                       | 250 (2.0%)                             |
| <b>Sex</b>                                    |                            |                              |                              |                              |                                     |                                        |
| Female                                        | 387,500 (57.0%)            | 241,015 (57.6%)              | 112,810 (58.3%)              | 27,035 (53.6%)               | 1,710 (37.2%)                       | 4,925 (38.6%)                          |
| Male                                          | 291,905 (43.0%)            | 177,080 (42.4%)              | 80,665 (41.7%)               | 23,430 (46.4%)               | 2,885 (62.8%)                       | 7,845 (61.4%)                          |
| <b>Ethnicity</b>                              |                            |                              |                              |                              |                                     |                                        |
| White                                         | 645,830 (95.1%)            | 399,635 (95.6%)              | 184,715 (95.5%)              | 47,335 (93.8%)               | 3,755 (81.7%)                       | 10,390 (81.4%)                         |
| Mixed                                         | 2,740 (0.4%)               | 1,620 (0.4%)                 | 710 (0.4%)                   | 215 (0.4%)                   | 60 (1.3%)                           | 140 (1.1%)                             |
| Asian or Asian British                        | 18,695 (2.8%)              | 9,955 (2.4%)                 | 4,920 (2.5%)                 | 1,820 (3.6%)                 | 490 (10.7%)                         | 1,510 (11.8%)                          |
| Black or Black British                        | 8,275 (1.2%)               | 4,630 (1.1%)                 | 2,155 (1.1%)                 | 780 (1.5%)                   | 235 (5.1%)                          | 470 (3.7%)                             |
| Other ethnic groups                           | 3,865 (0.6%)               | 2,255 (0.5%)                 | 980 (0.5%)                   | 315 (0.6%)                   | 55 (1.2%)                           | 260 (2.0%)                             |
| <b>Index of multiple deprivation quintile</b> |                            |                              |                              |                              |                                     |                                        |
| 1 most deprived                               | 103,695 (15.3%)            | 60,420 (14.5%)               | 30,950 (16.0%)               | 8,705 (17.2%)                | 1,015 (22.1%)                       | 2,600 (20.4%)                          |
| 2                                             | 124,970 (18.4%)            | 74,870 (17.9%)               | 36,495 (18.9%)               | 9,935 (19.7%)                | 1,005 (21.9%)                       | 2,665 (20.9%)                          |
| 3                                             | 155,525 (22.9%)            | 95,730 (22.9%)               | 44,525 (23.0%)               | 11,530 (22.8%)               | 980 (21.3%)                         | 2,760 (21.6%)                          |
| 4                                             | 152,900 (22.5%)            | 95,975 (23.0%)               | 42,745 (22.1%)               | 10,810 (21.4%)               | 845 (18.4%)                         | 2,520 (19.7%)                          |
| 5 least deprived                              | 142,315 (20.9%)            | 91,100 (21.8%)               | 38,755 (20.0%)               | 9,485 (18.8%)                | 745 (16.2%)                         | 2,225 (17.4%)                          |
| <b>Setting</b>                                |                            |                              |                              |                              |                                     |                                        |
| Urban city or town                            | 362,390 (53.3%)            | 222,365 (53.2%)              | 103,970 (53.7%)              | 27,115 (53.7%)               | 2,320 (50.5%)                       | 6,615 (51.8%)                          |
| Urban conurbation                             | 138,875 (20.4%)            | 83,815 (20.0%)               | 39,355 (20.3%)               | 10,895 (21.6%)               | 1,320 (28.7%)                       | 3,495 (27.4%)                          |
| Rural                                         | 178,145 (26.2%)            | 111,915 (26.8%)              | 50,150 (25.9%)               | 12,460 (24.7%)               | 960 (20.9%)                         | 2,660 (20.8%)                          |
| <b>Primary care coding of kidney disease</b>  |                            |                              |                              |                              |                                     |                                        |
| CKD3–5 diagnostic code                        | 424,480 (62.5%)            | 214,160 (51.2%)              | 151,790 (78.5%)              | 44,890 (89.0%)               | 3,985 (86.7%)                       | 9,655 (75.6%)                          |
| Dialysis code                                 | 12,025 (1.8%)              | 0 (0.0%)                     | 0 (0.0%)                     | 0 (0.0%)                     | 3,720 (81.0%)                       | 8,305 (65.0%)                          |
| Kidney transplant code                        | 13,435 (2.0%)              | 0 (0.0%)                     | 0 (0.0%)                     | 0 (0.0%)                     | 1,070 (23.3%)                       | 12,360 (96.8%)                         |
| <b>Risk group (occupation/access)</b>         |                            |                              |                              |                              |                                     |                                        |
| Care home resident                            | 43,385 (6.4%)              | 23,700 (5.7%)                | 14,845 (7.7%)                | 4,605 (9.1%)                 | 165 (3.6%)                          | 65 (0.5%)                              |
| Health/social care worker                     | 1,095 (0.2%)               | 565 (0.1%)                   | 120 (0.1%)                   | 35 (0.1%)                    | 20 (0.4%)                           | 355 (2.8%)                             |
| Housebound                                    | 49,420 (7.3%)              | 24,345 (5.8%)                | 17,740 (9.2%)                | 6,345 (12.6%)                | 375 (8.2%)                          | 615 (4.8%)                             |
| End of life care                              | 35,765 (5.3%)              | 17,935 (4.3%)                | 12,290 (6.4%)                | 4,995 (9.9%)                 | 365 (7.9%)                          | 180 (1.4%)                             |
| <b>Risk group (clinical)</b>                  |                            |                              |                              |                              |                                     |                                        |
| Prior SARS-CoV-2 *                            | 19,170 (2.8%)              | 10,080 (2.4%)                | 6,040 (3.1%)                 | 2,065 (4.1%)                 | 475 (10.3%)                         | 515 (4.0%)                             |
| Immunosuppression                             | 80,025 (11.8%)             | 43,575 (10.4%)               | 18,245 (9.4%)                | 5,525 (10.9%)                | 2,065 (44.9%)                       | 10,615 (83.1%)                         |
| Moderate/severe obesity                       | 55,040 (8.1%)              | 31,670 (7.6%)                | 16,970 (8.8%)                | 4,880 (9.7%)                 | 360 (7.8%)                          | 1,160 (9.1%)                           |
| Diabetes                                      | 190,140 (28.0%)            | 100,110 (23.9%)              | 62,990 (32.6%)               | 21,315 (42.2%)               | 1,685 (36.7%)                       | 4,040 (31.6%)                          |
| Chronic respiratory disease (inc. asthma)     | 151,400 (22.3%)            | 91,725 (21.9%)               | 44,605 (23.1%)               | 11,810 (23.4%)               | 1,005 (21.9%)                       | 2,255 (17.7%)                          |
| Chronic heart disease                         | 340,605 (50.1%)            | 195,385 (46.7%)              | 107,965 (55.8%)              | 30,860 (61.2%)               | 2,535 (55.2%)                       | 3,860 (30.2%)                          |

|                                           |                 |                |                |                |               |               |
|-------------------------------------------|-----------------|----------------|----------------|----------------|---------------|---------------|
| Chronic liver disease                     | 18,715 (2.8%)   | 11,090 (2.7%)  | 5,290 (2.7%)   | 1,505 (3.0%)   | 240 (5.2%)    | 585 (4.6%)    |
| Asplenia                                  | 5,930 (0.9%)    | 3,650 (0.9%)   | 1,575 (0.8%)   | 455 (0.9%)     | 80 (1.7%)     | 170 (1.3%)    |
| Cancer (non-haematologic)                 | 128,475 (18.9%) | 77,375 (18.5%) | 38,315 (19.8%) | 11,020 (21.8%) | 805 (17.5%)   | 960 (7.5%)    |
| Haematologic cancer                       | 19,990 (2.9%)   | 11,885 (2.8%)  | 5,705 (2.9%)   | 1,845 (3.7%)   | 310 (6.7%)    | 240 (1.9%)    |
| Organ transplant (non-kidney) †           | 2,170 (0.3%)    | 1,195 (0.3%)   | 685 (0.4%)     | 215 (0.4%)     | 75 (1.6%)     | [N]           |
| CND (inc. learning disability)            | 131,900 (19.4%) | 77,535 (18.5%) | 41,125 (21.3%) | 11,295 (22.4%) | 765 (16.6%)   | 1,185 (9.3%)  |
| Severe mental illness                     | 9,190 (1.4%)    | 5,405 (1.3%)   | 2,700 (1.4%)   | 835 (1.7%)     | 80 (1.7%)     | 170 (1.3%)    |
| Clinically extremely vulnerable (other) § | 3,990 (0.6%)    | 2,370 (0.6%)   | 1,170 (0.6%)   | 450 (0.9%)     | [N]           | [N]           |
| <b>Region</b>                             |                 |                |                |                |               |               |
| London                                    | 20,255 (3.0%)   | 11,740 (2.8%)  | 5,490 (2.8%)   | 1,800 (3.6%)   | 315 (6.9%)    | 910 (7.1%)    |
| East of England                           | 152,635 (22.5%) | 94,895 (22.7%) | 42,880 (22.2%) | 10,840 (21.5%) | 1,055 (23.0%) | 2,970 (23.3%) |
| East Midlands                             | 125,850 (18.5%) | 77,615 (18.6%) | 35,975 (18.6%) | 9,215 (18.3%)  | 790 (17.2%)   | 2,250 (17.6%) |
| North East                                | 31,955 (4.7%)   | 19,750 (4.7%)  | 9,150 (4.7%)   | 2,215 (4.4%)   | 240 (5.2%)    | 595 (4.7%)    |
| North West                                | 62,430 (9.2%)   | 38,315 (9.2%)  | 17,940 (9.3%)  | 4,700 (9.3%)   | 305 (6.6%)    | 1,165 (9.1%)  |
| South East                                | 42,580 (6.3%)   | 26,645 (6.4%)  | 11,810 (6.1%)  | 3,100 (6.1%)   | 290 (6.3%)    | 735 (5.8%)    |
| South West                                | 122,945 (18.1%) | 76,210 (18.2%) | 35,105 (18.1%) | 9,145 (18.1%)  | 695 (15.1%)   | 1,790 (14.0%) |
| West Midlands                             | 24,805 (3.7%)   | 14,830 (3.5%)  | 7,255 (3.7%)   | 1,975 (3.9%)   | 275 (6.0%)    | 465 (3.6%)    |
| Yorkshire and the Humber                  | 95,950 (14.1%)  | 58,095 (13.9%) | 27,870 (14.4%) | 7,480 (14.8%)  | 620 (13.5%)   | 1,885 (14.8%) |

Individuals were included in the analysis if they were  $\geq 75$  years of age at baseline, care home residents, transplant recipients, or had a history of haematologic malignancy or immunosuppression. Data are n (%) after rounding to the nearest 5. Primary care codes and risk groups are coded by separate binary variables; percentages under these table subheadings therefore do not sum to 100. Among people with CKD4–5, 46,830 had stage 4 CKD (eGFR 15–29 ml/min/1.73 m<sup>2</sup>) and 3,635 had stage 5 CKD (eGFR <15ml/min/1.73 m<sup>2</sup>). CKD, chronic kidney disease; CND, chronic neurological disease; [N], covariate absent in all individuals by definition; RRT, renal replacement therapy. \* Based on prior evidence of a positive SARS-CoV-2 test, COVID-19-related primary care code, or COVID-19-related hospitalisation as of 1<sup>st</sup> December 2020; † Excludes individuals with kidney transplants based on primary care coding or UK Renal Registry status; § Classified as clinically extremely vulnerable in the absence of any of the comorbidities listed above (including RRT).



**Supplementary Table 5. Cox proportional hazards models for factors associated with completion of a 4-dose vaccination series in people with kidney disease.**

| Variable                                     | N (n events)      | Cov. (%) | HR (95% CI), minimally adjusted | HR (95% CI), partially adjusted | HR (95% CI), fully adjusted |
|----------------------------------------------|-------------------|----------|---------------------------------|---------------------------------|-----------------------------|
| <b>*†Age</b>                                 |                   |          |                                 |                                 |                             |
| 16–64 (ref)                                  | 20,015 (8,005)    | 42.5     | 1.00                            | 1.00                            | 1.00                        |
| 65–69                                        | 8,210 (3,340)     | 44.9     | 1.08 (1.04-1.12)                | 0.99 (0.95-1.03)                | 1.52 (1.45-1.58)            |
| 70–74                                        | 13,795 (6,090)    | 50.0     | 1.22 (1.18-1.26)                | 1.06 (1.03-1.10)                | 1.80 (1.73-1.87)            |
| 75–79                                        | 172,530 (99,315)  | 62.8     | 1.38 (1.35-1.41)                | 1.51 (1.47-1.54)                | 2.76 (2.67-2.85)            |
| 80+                                          | 464,860 (232,695) | 61.9     | 1.41 (1.38-1.45)                | 1.59 (1.55-1.64)                | 2.95 (2.86-3.05)            |
| <b>†Sex</b>                                  |                   |          |                                 |                                 |                             |
| Female (ref)                                 | 387,500 (192,935) | 58.6     | 1.00                            | 1.00                            | 1.00                        |
| Male                                         | 291,905 (156,510) | 64.4     | 1.19 (1.18-1.19)                | 1.17 (1.16-1.17)                | 1.16 (1.16-1.17)            |
| <b>†Ethnicity</b>                            |                   |          |                                 |                                 |                             |
| White (ref)                                  | 645,830 (340,050) | 62.5     | 1.00                            | 1.00                            | 1.00                        |
| Mixed                                        | 2,740 (875)       | 36.9     | 0.51 (0.47-0.54)                | 0.53 (0.50-0.57)                | 0.54 (0.50-0.57)            |
| Asian or Asian British                       | 18,695 (5,205)    | 32.8     | 0.44 (0.43-0.45)                | 0.48 (0.46-0.49)                | 0.47 (0.45-0.48)            |
| Black or Black British                       | 8,275 (1,805)     | 25.1     | 0.32 (0.31-0.34)                | 0.35 (0.33-0.37)                | 0.36 (0.34-0.37)            |
| Other ethnic groups                          | 3,865 (1,510)     | 46.5     | 0.69 (0.66-0.73)                | 0.71 (0.68-0.75)                | 0.69 (0.66-0.73)            |
| <b>†IMD</b>                                  |                   |          |                                 |                                 |                             |
| 1 most deprived (ref)                        | 103,695 (41,680)  | 48.9     | 1.00                            | 1.00                            | 1.00                        |
| 2                                            | 124,970 (58,805)  | 56.5     | 1.23 (1.22-1.25)                | 1.19 (1.18-1.21)                | 1.19 (1.17-1.20)            |
| 3                                            | 155,525 (81,110)  | 61.8     | 1.40 (1.38-1.41)                | 1.32 (1.30-1.34)                | 1.31 (1.29-1.33)            |
| 4                                            | 152,900 (84,305)  | 64.8     | 1.51 (1.49-1.53)                | 1.42 (1.40-1.44)                | 1.40 (1.39-1.42)            |
| 5 least deprived                             | 142,315 (83,545)  | 68.6     | 1.65 (1.63-1.67)                | 1.54 (1.53-1.56)                | 1.52 (1.50-1.54)            |
| <b>†Setting</b>                              |                   |          |                                 |                                 |                             |
| Urban city or town (ref)                     | 362,390 (186,715) | 61.2     | 1.00                            | 1.00                            | 1.00                        |
| Urban conurbation                            | 138,875 (64,560)  | 55.9     | 0.96 (0.95-0.97)                | 1.02 (1.01-1.03)                | 1.01 (1.00-1.03)            |
| Rural town or village                        | 178,145 (98,170)  | 64.7     | 1.08 (1.07-1.09)                | 1.00 (0.99-1.01)                | 1.00 (0.99-1.01)            |
| <b>Kidney disease subgroup</b>               |                   |          |                                 |                                 |                             |
| CKD3a (ref)                                  | 418,095 (228,710) | 62.5     | 1.00                            | 1.00                            | 1.00                        |
| CKD3b                                        | 193,475 (92,595)  | 59.3     | 0.91 (0.90-0.91)                | 0.92 (0.92-0.93)                | 0.92 (0.91-0.93)            |
| CKD4–5                                       | 50,465 (19,400)   | 55.2     | 0.83 (0.82-0.84)                | 0.86 (0.85-0.87)                | 0.86 (0.85-0.87)            |
| RRT (dialysis)                               | 4,595 (1,715)     | 50.0     | 1.10 (1.05-1.15)                | 1.19 (1.13-1.24)                | 1.18 (1.12-1.23)            |
| RRT (transplant)                             | 12,770 (7,025)    | 58.9     | 2.71 (2.62-2.80)                | 2.96 (2.86-3.06)                | 3.08 (2.98-3.18)            |
| <b>Primary care coding of kidney disease</b> |                   |          |                                 |                                 |                             |
| CKD diagnostic code                          | 424,480 (217,290) | 61.2     | 1.00 (1.00-1.01)                | 1.02 (1.01-1.02)                | 1.04 (1.04-1.05)            |
| <b>Risk group (occupation/access)</b>        |                   |          |                                 |                                 |                             |
| *†Care home resident                         | 43,385 (11,695)   | 49.5     | 0.67 (0.65-0.68)                | 0.73 (0.72-0.74)                | 0.79 (0.77-0.80)            |
| *†Health/social care worker                  | 1,095 (645)       | 59.6     | 1.46 (1.35-1.58)                | 1.50 (1.39-1.63)                | 1.46 (1.35-1.58)            |
| †Housebound                                  | 49,420 (14,125)   | 43.3     | 0.57 (0.56-0.58)                | 0.60 (0.59-0.61)                | 0.61 (0.60-0.62)            |
| †End of life care                            | 35,765 (9,855)    | 51.4     | 0.83 (0.82-0.85)                | 0.88 (0.86-0.89)                | 0.88 (0.86-0.90)            |
| <b>Risk group (clinical)</b>                 |                   |          |                                 |                                 |                             |
| †Prior SARS-CoV-2                            | 19,170 (6,395)    | 51.5     | 0.86 (0.84-0.89)                | 0.92 (0.90-0.94)                | 0.93 (0.90-0.95)            |
| †Immunosuppression                           | 80,025 (38,925)   | 56.7     | 1.32 (1.30-1.33)                | 1.26 (1.24-1.28)                | 1.21 (1.20-1.23)            |
| Moderate/severe obesity                      | 55,040 (26,605)   | 55.1     | 0.84 (0.83-0.85)                | 0.89 (0.88-0.90)                | 0.92 (0.91-0.93)            |
| Diabetes                                     | 190,140 (89,055)  | 57.2     | 0.87 (0.87-0.88)                | 0.92 (0.91-0.93)                | 0.93 (0.92-0.94)            |
| CRD (inc. asthma)                            | 151,400 (73,560)  | 59.6     | 0.97 (0.96-0.98)                | 1.00 (0.99-1.01)                | 1.01 (1.00-1.02)            |
| Chronic heart disease                        | 340,605 (167,470) | 60.9     | 0.97 (0.97-0.98)                | 0.96 (0.95-0.97)                | 0.97 (0.97-0.98)            |
| Chronic liver disease                        | 18,715 (9,190)    | 58.3     | 1.01 (0.99-1.03)                | 1.03 (1.01-1.05)                | 1.03 (1.01-1.05)            |
| Asplenia                                     | 5,930 (3,175)     | 63.2     | 1.12 (1.08-1.16)                | 1.09 (1.05-1.12)                | 1.08 (1.05-1.12)            |
| Cancer (non-haematologic)                    | 128,475 (66,290)  | 64.3     | 1.10 (1.09-1.11)                | 1.07 (1.06-1.08)                | 1.07 (1.06-1.08)            |
| †Haematologic cancer                         | 19,990 (10,400)   | 64.4     | 1.47 (1.44-1.50)                | 1.23 (1.20-1.26)                | 1.33 (1.30-1.36)            |
| Organ transplant (non-kidney)                | 2,170 (1,210)     | 62.3     | 1.81 (1.71-1.92)                | 1.82 (1.72-1.93)                | 2.41 (2.28-2.56)            |
| CND (inc. learning disability)               | 131,900 (55,625)  | 56.2     | 0.86 (0.85-0.87)                | 0.87 (0.86-0.88)                | 0.88 (0.87-0.89)            |
| Severe mental illness                        | 9,190 (3,195)     | 44.0     | 0.67 (0.65-0.69)                | 0.72 (0.69-0.74)                | 0.74 (0.71-0.76)            |
| CEV (other)                                  | 3,990 (2,045)     | 61.2     | 1.04 (1.00-1.09)                | 1.10 (1.05-1.15)                | 1.05 (1.01-1.10)            |

Cumulative coverage was determined based on Kaplan-Meier estimates, censoring on death, deregistration, or 11<sup>th</sup> May 2022. \* variable included in all minimally adjusted models; † variable included in all partially adjusted models. CI, confidence interval; CKD, chronic kidney disease; HR, hazard ratio; IMD, index of multiple deprivation; OR, odds ratio; RRT, renal replacement therapy.

**Supplementary Table 6. Cox proportional hazards models for factors associated with completion of a 3-dose vaccination series in kidney disease subgroups.**

| Variable                                     | CKD3a             |          |                  | CKD3b            |          |                  | CKD4-5          |          |                  | RRT (dialysis) |          |                  | RRT (transplant) |          |                  |
|----------------------------------------------|-------------------|----------|------------------|------------------|----------|------------------|-----------------|----------|------------------|----------------|----------|------------------|------------------|----------|------------------|
|                                              | N (n events)      | Cov. (%) | HR (95% CI)      | N (n events)     | Cov. (%) | HR (95% CI)      | N (n events)    | Cov. (%) | HR (95% CI)      | N (n events)   | Cov. (%) | HR (95% CI)      | N (n events)     | Cov. (%) | HR (95% CI)      |
| <b>Age</b>                                   |                   |          |                  |                  |          |                  |                 |          |                  |                |          |                  |                  |          |                  |
| 16-64 (ref)                                  | 6,775 (2,000)     | 31.0     | 1.00             | 1,845 (585)      | 34.4     | 1.00             | 800 (255)       | 35.4     | 1.00             | 1,300 (440)    | 37.3     | 1.00             | 9,295 (4,730)    | 53.3     | 1.00             |
| 65-69                                        | 4,705 (1,630)     | 37.2     | 1.21 (1.13-1.29) | 1,395 (515)      | 41.3     | 1.21 (1.08-1.37) | 435 (165)       | 43.7     | 1.36 (1.11-1.65) | 245 (85)       | 40.8     | 1.22 (0.97-1.54) | 1,425 (945)      | 72.1     | 1.60 (1.49-1.72) |
| 70-74                                        | 8,730 (3,790)     | 47.9     | 1.61 (1.52-1.70) | 2,815 (1,105)    | 46.0     | 1.27 (1.15-1.41) | 825 (305)       | 48.1     | 1.37 (1.16-1.62) | 245 (90)       | 48.1     | 1.35 (1.07-1.70) | 1,180 (800)      | 75.9     | 1.67 (1.55-1.81) |
| 75-79                                        | 124,030 (74,145)  | 63.9     | 2.58 (2.46-2.71) | 38,245 (20,495)  | 59.9     | 1.97 (1.81-2.15) | 8,410 (3,765)   | 56.3     | 1.76 (1.54-2.02) | 1,220 (495)    | 55.6     | 1.45 (1.19-1.75) | 620 (410)        | 76.2     | 1.67 (1.51-1.85) |
| 80+                                          | 273,855 (147,145) | 63.7     | 2.79 (2.66-2.92) | 149,170 (69,900) | 59.9     | 2.12 (1.95-2.30) | 40,000 (14,910) | 55.7     | 1.82 (1.59-2.08) | 1,590 (605)    | 58.1     | 1.62 (1.33-1.96) | 250 (140)        | 73.5     | 1.68 (1.42-1.99) |
| <b>Sex</b>                                   |                   |          |                  |                  |          |                  |                 |          |                  |                |          |                  |                  |          |                  |
| Female (ref)                                 | 241,015 (127,790) | 60.2     | 1.00             | 112,810 (51,900) | 56.4     | 1.00             | 27,035 (9,830)  | 51.4     | 1.00             | 1,710 (585)    | 44.9     | 1.00             | 4,925 (2,825)    | 60.8     | 1.00             |
| Male                                         | 177,080 (100,920) | 65.8     | 1.15 (1.14-1.16) | 80,665 (40,695)  | 63.3     | 1.19 (1.18-1.21) | 23,430 (9,565)  | 59.8     | 1.24 (1.20-1.27) | 2,885 (1,130)  | 52.8     | 1.19 (1.07-1.31) | 7,845 (4,200)    | 57.7     | 0.92 (0.87-0.96) |
| <b>Ethnicity</b>                             |                   |          |                  |                  |          |                  |                 |          |                  |                |          |                  |                  |          |                  |
| White (ref)                                  | 399,635 (223,240) | 63.9     | 1.00             | 184,715 (90,355) | 60.6     | 1.00             | 47,335 (18,735) | 57.0     | 1.00             | 3,755 (1,480)  | 54.0     | 1.00             | 10,390 (6,240)   | 64.3     | 1.00             |
| Mixed                                        | 1,620 (550)       | 38.1     | 0.54 (0.50-0.59) | 710 (210)        | 35.5     | 0.51 (0.45-0.58) | 215 (55)        | 33.3     | 0.59 (0.45-0.77) | 60 (15)        | 20.0     | 0.59 (0.35-0.97) | 140 (45)         | 30.8     | 0.49 (0.36-0.65) |
| Asian or Asian British                       | 9,955 (2,965)     | 33.8     | 0.46 (0.45-0.48) | 4,920 (1,220)    | 30.5     | 0.45 (0.43-0.48) | 1,820 (360)     | 28.1     | 0.46 (0.41-0.51) | 490 (140)      | 35.6     | 0.59 (0.49-0.71) | 1,510 (515)      | 36.1     | 0.51 (0.47-0.56) |
| Black or Black British                       | 4,630 (1,020)     | 24.4     | 0.34 (0.32-0.36) | 2,155 (455)      | 24.9     | 0.37 (0.33-0.40) | 780 (150)       | 23.1     | 0.39 (0.33-0.46) | 235 (60)       | 32.6     | 0.53 (0.40-0.69) | 470 (120)        | 27.3     | 0.38 (0.32-0.46) |
| Other ethnic groups                          | 2,255 (935)       | 47.4     | 0.70 (0.66-0.75) | 980 (355)        | 44.2     | 0.70 (0.63-0.78) | 315 (100)       | 42.8     | 0.75 (0.61-0.91) | 55 (15)        | 20.0     | 0.59 (0.35-0.98) | 260 (105)        | 41.7     | 0.63 (0.51-0.76) |
| <b>IMD</b>                                   |                   |          |                  |                  |          |                  |                 |          |                  |                |          |                  |                  |          |                  |
| 1 most deprived (ref)                        | 60,420 (26,045)   | 50.4     | 1.00             | 30,950 (11,780)  | 48.2     | 1.00             | 8,705 (2,590)   | 43.7     | 1.00             | 1,015 (285)    | 36.5     | 1.00             | 2,600 (985)      | 40.3     | 1.00             |
| 2                                            | 74,870 (37,585)   | 58.0     | 1.19 (1.17-1.21) | 36,495 (16,045)  | 55.0     | 1.17 (1.14-1.20) | 9,935 (3,525)   | 51.5     | 1.17 (1.13-1.25) | 1,005 (355)    | 47.4     | 1.19 (1.19-1.64) | 2,665 (1,290)    | 51.5     | 1.37 (1.26-1.49) |
| 3                                            | 95,730 (52,840)   | 63.0     | 1.31 (1.29-1.33) | 44,525 (21,715)  | 60.2     | 1.30 (1.27-1.33) | 11,530 (4,530)  | 56.3     | 1.30 (1.23-1.37) | 980 (395)      | 53.1     | 1.54 (1.31-1.81) | 2,760 (1,625)    | 63.0     | 1.69 (1.55-1.83) |
| 4                                            | 95,975 (55,950)   | 66.1     | 1.41 (1.39-1.43) | 42,745 (21,840)  | 62.8     | 1.39 (1.36-1.42) | 10,810 (4,560)  | 59.3     | 1.40 (1.33-1.47) | 845 (355)      | 55.4     | 1.61 (1.37-1.91) | 2,520 (1,605)    | 67.9     | 1.86 (1.71-2.02) |
| 5 least deprived                             | 91,100 (56,295)   | 69.7     | 1.53 (1.51-1.55) | 38,755 (21,215)  | 66.6     | 1.51 (1.48-1.55) | 9,485 (4,195)   | 62.8     | 1.49 (1.42-1.57) | 745 (320)      | 57.7     | 1.73 (1.46-2.05) | 2,225 (1,525)    | 72.7     | 2.05 (1.88-2.23) |
| <b>Setting</b>                               |                   |          |                  |                  |          |                  |                 |          |                  |                |          |                  |                  |          |                  |
| Urban city or town (ref)                     | 222,365 (121,865) | 62.7     | 1.00             | 103,970 (50,030) | 59.6     | 1.00             | 27,115 (10,385) | 55.1     | 1.00             | 2,320 (805)    | 46.6     | 1.00             | 6,615 (3,630)    | 58.8     | 1.00             |
| Urban conurbation                            | 83,815 (41,785)   | 57.7     | 1.02 (1.01-1.04) | 39,355 (16,900)  | 53.9     | 1.01 (0.99-1.03) | 10,895 (3,770)  | 50.1     | 1.04 (0.99-1.09) | 1,320 (480)    | 47.4     | 1.08 (0.92-1.26) | 3,495 (1,625)    | 49.5     | 1.05 (0.97-1.14) |
| Rural town or village                        | 111,915 (65,065)  | 65.8     | 1.00 (0.99-1.01) | 50,150 (25,665)  | 62.7     | 0.99 (0.98-1.01) | 12,460 (5,245)  | 60.0     | 1.03 (0.99-1.06) | 960 (430)      | 59.9     | 1.19 (1.06-1.35) | 2,660 (1,770)    | 71.0     | 1.17 (1.10-1.23) |
| <b>Primary care coding of kidney disease</b> |                   |          |                  |                  |          |                  |                 |          |                  |                |          |                  |                  |          |                  |
| CKD diagnostic code                          | 214,160 (118,570) | 63.2     | 1.03 (1.02-1.03) | 151,790 (74,260) | 59.9     | 1.07 (1.05-1.08) | 44,890 (17,535) | 55.6     | 1.06 (1.01-1.12) | 3,985 (1,485)  | 50.7     | 0.98 (0.85-1.14) | 9,655 (5,435)    | 60.6     | 1.13 (1.07-1.19) |
| <b>Risk group (occupation/access)</b>        |                   |          |                  |                  |          |                  |                 |          |                  |                |          |                  |                  |          |                  |
| Care home resident                           | 23,700 (6,855)    | 49.5     | 0.72 (0.70-0.74) | 14,845 (3,800)   | 49.4     | 0.76 (0.74-0.79) | 4,605 (995)     | 49.9     | 0.86 (0.80-0.92) | 165 (30)       | 22.2     | 0.64 (0.44-0.94) | 65 (20)          | 33.3     | 0.46 (0.30-0.72) |
| Health/social care worker                    | 565 (325)         | 58.1     | 1.53 (1.37-1.70) | 120 (70)         | 50.0     | 1.36 (1.08-1.73) | [R]             | [R]      | [R]              | [R]            | [R]      | [R]              | 355 (225)        | 61.1     | 1.31 (1.15-1.50) |
| Housebound                                   | 24,345 (7,520)    | 44.2     | 0.59 (0.58-0.60) | 17,740 (4,835)   | 42.1     | 0.59 (0.58-0.61) | 6,345 (1,320)   | 38.8     | 0.60 (0.57-0.64) | 375 (100)      | 44.9     | 0.88 (0.72-1.08) | 615 (345)        | 61.5     | 0.95 (0.85-1.06) |
| End of life care                             | 17,935 (5,395)    | 52.4     | 0.87 (0.84-0.89) | 12,290 (3,240)   | 50.5     | 0.89 (0.86-0.92) | 4,995 (1,035)   | 48.5     | 0.92 (0.86-0.98) | 365 (90)       | 43.5     | 0.77 (0.63-0.96) | 180 (90)         | 68.3     | 1.26 (1.02-1.56) |
| <b>Risk group (clinical)</b>                 |                   |          |                  |                  |          |                  |                 |          |                  |                |          |                  |                  |          |                  |
| Prior SARS-CoV-2                             | 10,080 (3,705)    | 53.2     | 0.92 (0.89-0.95) | 6,040 (1,840)    | 50.4     | 0.92 (0.87-0.96) | 2,065 (485)     | 47.0     | 0.91 (0.83-1.00) | 475 (140)      | 41.7     | 0.85 (0.71-1.02) | 515 (230)        | 46.7     | 0.88 (0.77-1.00) |
| Immunosuppression                            | 43,575 (21,400)   | 55.8     | 1.22 (1.19-1.24) | 18,245 (8,595)   | 58.1     | 1.26 (1.22-1.29) | 5,525 (2,200)   | 55.9     | 1.34 (1.26-1.42) | 2,065 (750)    | 44.2     | 1.05 (0.88-1.25) | 10,615 (5,975)   | 60.3     | 1.17 (1.10-1.26) |
| Moderate/severe obesity                      | 31,670 (16,170)   | 56.1     | 0.90 (0.89-0.92) | 16,970 (7,815)   | 54.1     | 0.91 (0.89-0.93) | 4,880 (1,865)   | 50.4     | 0.92 (0.87-0.96) | 360 (130)      | 45.9     | 0.99 (0.83-1.19) | 1,160 (630)      | 56.7     | 1.03 (0.95-1.12) |
| Diabetes                                     | 100,110 (50,045)  | 58.2     | 0.91 (0.90-0.92) | 62,990 (28,520)  | 56.6     | 0.94 (0.93-0.96) | 21,315 (7,790)  | 53.1     | 0.95 (0.92-0.98) | 1,685 (555)    | 48.2     | 0.96 (0.86-1.06) | 4,040 (2,145)    | 58.4     | 1.03 (0.98-1.09) |
| CRD (inc. asthma)                            | 91,725 (47,415)   | 60.9     | 1.00 (0.99-1.01) | 44,605 (20,325)  | 58.2     | 1.01 (0.99-1.02) | 11,810 (4,285)  | 54.3     | 1.01 (0.98-1.05) | 1,005 (355)    | 50.1     | 1.08 (0.96-1.21) | 2,255 (1,175)    | 56.1     | 0.93 (0.87-0.99) |
| Chronic heart disease                        | 195,385 (103,225) | 62.5     | 0.96 (0.95-0.97) | 107,965 (49,800) | 59.2     | 0.97 (0.96-0.99) | 30,860 (11,355) | 55.5     | 0.98 (0.95-1.01) | 2,535 (910)    | 51.4     | 0.98 (0.89-1.08) | 3,860 (2,185)    | 63.3     | 1.05 (0.99-1.10) |
| Chronic liver disease                        | 11,090 (5,770)    | 59.4     | 1.05 (1.02-1.08) | 5,290 (2,410)    | 56.3     | 1.02 (0.98-1.06) | 1,505 (585)     | 55.0     | 1.06 (0.98-1.16) | 240 (85)       | 44.4     | 1.18 (0.94-1.47) | 585 (340)        | 60.9     | 1.22 (1.09-1.36) |
| Asplenia                                     | 3,650 (2,075)     | 64.5     | 1.09 (1.04-1.14) | 1,575 (795)      | 61.1     | 1.10 (1.02-1.18) | 455 (180)       | 55.5     | 1.08 (0.93-1.25) | 80 (35)        | 50.0     | 1.51 (1.07-2.14) | 170 (90)         | 56.2     | 0.98 (0.80-1.20) |
| Cancer (non-haematologic)                    | 77,375 (42,645)   | 65.7     | 1.07 (1.06-1.09) | 38,315 (18,430)  | 62.4     | 1.07 (1.05-1.09) | 11,020 (4,295)  | 59.0     | 1.08 (1.05-1.12) | 805 (320)      | 54.7     | 1.05 (0.93-1.19) | 960 (600)        | 70.7     | 1.16 (1.07-1.26) |
| Haematologic cancer                          | 11,885 (6,460)    | 64.3     | 1.33 (1.29-1.36) | 5,705 (2,895)    | 64.8     | 1.33 (1.27-1.39) | 1,845 (765)     | 61.5     | 1.32 (1.20-1.44) | 310 (135)      | 58.6     | 1.70 (1.40-2.06) | 240 (145)        | 63.6     | 1.06 (0.90-1.25) |
| Organ transplant (non-kidney)                | 1,195 (700)       | 62.4     | 2.57 (2.38-2.77) | 685 (365)        | 60.8     | 2.26 (2.03-2.52) | 215 (110)       | 57.2     | 1.97 (1.62-2.40) | 75 (35)        | 42.9     | 1.72 (1.23-2.41) | [N]              | [N]      | [N]              |
| CND (inc. learning disability)               | 77,535 (35,190)   | 57.6     | 0.87 (0.86-0.88) | 41,125 (16,030)  | 54.3     | 0.87 (0.85-0.88) | 11,295 (3,520)  | 51.6     | 0.90 (0.87-0.94) | 765 (235)      | 44.6     | 0.87 (0.76-1.01) | 1,185 (645)      | 60.1     | 1.01 (0.93-1.09) |
| Severe mental illness                        | 5,405 (1,945)     | 43.8     | 0.70 (0.67-0.74) | 2,700 (895)      | 43.6     | 0.74 (0.70-0.79) | 835 (250)       | 44.9     | 0.85 (0.75-0.96) | 80 (20)        | 28.6     | 0.71 (0.46-1.09) | 170 (85)         | 50.0     | 0.99 (0.79-1.22) |
| CEV (other)                                  | 2,370 (1,280)     | 61.8     | 1.09 (1.03-1.15) | 1,170 (575)      | 60.5     | 1.15 (1.06-1.25) | 450 (190)       | 55.3     | 1.10 (0.96-1.27) | [N]            | [N]      | [N]              | [N]              | [N]      | [N]              |

Individuals were included in the analysis if they were  $\geq 75$  years of age at baseline, care home residents, transplant recipients, or had a history of haematologic malignancy or immunosuppression. Counts are rounded to the nearest 5. Cumulative coverage was determined based on Kaplan-Meier estimates, censoring on death, deregistration, or 11<sup>th</sup> May 2022. Hazard ratios and 95% confidence intervals were derived from partially adjusted models that included age, care home residence, health and social care worker status, housebound status, receipt of end-of-life care, setting (urban/rural), sex, ethnicity, IMD quintile, prior SARS-CoV-2 infection, immunosuppression, and haematologic cancer. Data are redacted [R] for any rows in which there were  $>0$  and  $\leq 10$  event or non-event counts after rounding to the nearest 5, with non-event counts calculated among uncensored individuals. CEV, clinically extremely vulnerable; CKD, chronic kidney disease; CND, chronic neurological disease; IMD, index of multiple deprivation; [N], covariate absent in all individuals by definition; [R] redacted; RRT, renal replacement therapy.
